# Supplementary material for: Environmentally relevant concentration of caffeine—effect on activity and circadian rhythm in wild perch
Source: PubMed Central journal article supplement (PMC9356920; doi:10.1007/s11356-022-19583-3), 2022-03-17
Supplement: 11356_2022_19583_MOESM1_ESM.pdf [file 11356_2022_19583_MOESM1_ESM.pdf]

Environmentally relevant concentration of caffeine - effect on activity and circadian rhythm in wild perch

Cervený, D.<sup>a, b\*</sup>, Cisar, P.<sup>b</sup>, Brodin, T.<sup>a</sup>, McCallum, E.S.<sup>a</sup>, Fick, J.<sup>c</sup>

\*Corresponding author, [cervený@frov.jcu.cz](mailto:cervený@frov.jcu.cz)

<sup>a</sup> Department of Wildlife, Fish and Environmental Studies, Swedish University of Agricultural Sciences, SE-90183, Umeå, Sweden

<sup>b</sup> University of South Bohemia in Ceske Budejovice, Faculty of Fisheries and Protection of Waters, South Bohemian Research Center of Aquaculture and Biodiversity of Hydrocenoses, Zátíší 728/II, 389 25 Vodňany, Czech Republic

<sup>c</sup> Department of Chemistry, Umeå University, SE-90187, Umeå, Sweden

Supplementary material

Table S1. Time schedule of the experiment with experimental data from behavior trials

| group | fish ID         | treatment | start <sup>1</sup> | behavior trials (dates, scores in cm of total swam distance) |             |            |                   |             |            |                 |             |            |
|-------|-----------------|-----------|--------------------|--------------------------------------------------------------|-------------|------------|-------------------|-------------|------------|-----------------|-------------|------------|
|       |                 |           |                    | before exposure                                              |             |            | 24 hours exposure |             |            | 5 days exposure |             |            |
|       |                 |           |                    | date                                                         | score light | score dark | date              | score light | score dark | date            | score light | score dark |
| 1     | 1               | control   | 21.11.2018         | 24.11.2018                                                   | 5580        | 823        | 25.11.2018        | 6429        | 4012       | 29.11.2018      | 6896        | 1167       |
|       | 2               |           |                    |                                                              | 657         | 62         |                   | 880         | 116        |                 | 1597        | 638        |
|       | 3               |           |                    |                                                              | 4367        | 291        |                   | 8769        | 1435       |                 | 9593        | 2165       |
|       | 4               |           |                    |                                                              | 374         | 289        |                   | 1039        | 229        |                 | 5891        | 198        |
|       | 5               | caffeine  |                    |                                                              | 2031        | 55         |                   | 2629        | 135        |                 | 241         | 481        |
|       | 6               |           |                    |                                                              | 1664        | 150        |                   | 153         | 0          |                 | 271         | 127        |
|       | 7               |           |                    |                                                              | 5699        | 86         |                   | 5547        | 379        |                 | 11967       | 562        |
|       | 8               |           |                    |                                                              | 4245        | 251        |                   | 2548        | 672        |                 | 1375        | 817        |
| 2     | NA <sup>2</sup> | control   | 23.11.2018         | 26.11.2018                                                   | 27.11.2018  | 1.12.2018  | 2627              | 383         | 3730       | 587             | 5453        | 2501       |
|       | 11              |           |                    |                                                              |             |            | 1961              | 104         | 643        | 133             | 8573        | 109        |
|       | 12              | caffeine  |                    |                                                              |             |            | 5042              | 481         | 7345       | 1174            | 16247       | 795        |
|       | 15              |           |                    |                                                              |             |            | 1882              | 150         | 5530       | 232             | 8459        | 202        |
|       | 16              |           |                    |                                                              |             |            | 5715              | 84          | 4024       | 456             | 6537        | 1964       |
|       | 17              |           |                    |                                                              |             |            | 3269              | 271         | 5654       | 8218            | 7105        | 1232       |
| 3     | 18              | control   | 29.11.2018         | 2.12.2018                                                    | 3.12.2018   | 7.12.2018  | 849               | 356         | 2588       | 583             | 2684        | 1495       |
|       | 19              |           |                    |                                                              |             |            | 1790              | 104         | 8927       | 1108            | 2822        | 4418       |
|       | 20              |           |                    |                                                              |             |            | 3961              | 151         | 7448       | 5478            | 5264        | 4549       |
|       | 21              | caffeine  |                    |                                                              |             |            | 4246              | 554         | 4244       | 421             | 4860        | 6071       |
|       | 22              |           |                    |                                                              |             |            | 4491              | 103         | 108        | 119             | 69          | 125        |
|       | 23              |           |                    |                                                              |             |            | 7479              | 120         | 12242      | 50              | 12571       | 10         |
|       | 24              |           |                    |                                                              |             |            | 3294              | 7231        | 4923       | 607             | 8137        | 9186       |
| 4     | 25              | control   | 1.12.2018          | 4.12.2018                                                    | 5.12.2018   | 9.12.2018  | 2619              | 977         | 3850       | 321             | 5341        | 6373       |
|       | 26              |           |                    |                                                              |             |            | 2148              | 326         | 5439       | 148             | 5165        | 333        |
|       | 27              |           |                    |                                                              |             |            | 2519              | 286         | 1111       | 192             | 3997        | 747        |
|       | 28              |           |                    |                                                              |             |            | 1625              | 323         | 4740       | 84              | 8577        | 540        |
|       | 29              | caffeine  |                    |                                                              |             |            | 2877              | 131         | 3451       | 7143            | 6244        | 7123       |
|       | 30              |           |                    |                                                              |             |            | 2521              | 190         | 9654       | 545             | 5045        | 3307       |
|       | 31              |           |                    |                                                              |             |            | 7594              | 82          | 3674       | 142             | 6273        | 154        |
|       | 32              |           |                    |                                                              |             |            |                   |             |            |                 |             |            |

<sup>1</sup> date when fish were moved into the individual containers, followed by three days of acclimatization before the first behavior trial and subsequent exposure

<sup>2</sup> four individuals (2 from each treatment) excluded from analysis due to the power failure at the building during behavior trial

Table S1, continued. Time schedule of the experiment with experimental data from behavior trials

| group | fish ID | treatment | start <sup>1</sup> | behavior trials (dates, scores in cm of total swam distance) |             |            |                   |             |            |                 |             |            |
|-------|---------|-----------|--------------------|--------------------------------------------------------------|-------------|------------|-------------------|-------------|------------|-----------------|-------------|------------|
|       |         |           |                    | before exposure                                              |             |            | 24 hours exposure |             |            | 5 days exposure |             |            |
|       |         |           |                    | date                                                         | score light | score dark | date              | score light | score dark | date            | score light | score dark |
| 5     | 33      | control   | 7.12.2018          | 10.12.2018                                                   | 205         | 422        | 11.12.2018        | 2937        | 281        | 15.11.2018      | 9567        | 13470      |
|       | 34      |           |                    |                                                              | 1012        | 577        |                   | 3709        | 8544       |                 | 13209       | 1745       |
|       | 35      |           |                    |                                                              | 2106        | 261        |                   | 2408        | 177        |                 | 3372        | 5534       |
|       | 36      |           |                    |                                                              | 5837        | 744        |                   | 11197       | 555        |                 | 12293       | 141        |
|       | 37      | caffeine  |                    |                                                              | 3729        | 505        |                   | 8203        | 11419      |                 | 10589       | 10467      |
|       | 38      |           |                    |                                                              | 1063        | 195        |                   | 2675        | 92         |                 | 4027        | 87         |
|       | 39      |           |                    |                                                              | 2338        | 140        |                   | 8424        | 59         |                 | 7169        | 220        |
|       | 40      |           |                    |                                                              | 524         | 145        |                   | 3271        | 134        |                 | 8198        | 322        |
| 6     | 41      | control   | 9.12.2018          | 12.12.2018                                                   | 2280        | 473        | 13.12.2018        | 6480        | 5987       | 17.12.2018      | 11889       | 1621       |
|       | 42      |           |                    |                                                              | 125         | 404        |                   | 6004        | 743        |                 | 1900        | 610        |
|       | 43      |           |                    |                                                              | 1126        | 212        |                   | 5362        | 0          |                 | 6604        | 470        |
|       | 44      |           |                    |                                                              | 124         | 142        |                   | 2401        | 132        |                 | 8274        | 162        |
|       | 45      | caffeine  |                    |                                                              | 1266        | 87         |                   | 7209        | 186        |                 | 6654        | 704        |
|       | 46      |           |                    |                                                              | 243         | 71         |                   | 4373        | 111        |                 | 7826        | 187        |
|       | 47      |           |                    |                                                              | 1714        | 119        |                   | 4579        | 55         |                 | 10933       | 586        |
|       | 48      |           |                    |                                                              | 2115        | 365        |                   | 1365        | 192        |                 | 7135        | 2933       |
| 7     | 49      | control   | 15.12.2018         | 18.12.2018                                                   | 2132        | 196        | 19.12.2018        | 4660        | 99         | 23.12.2018      | 9718        | 550        |
|       | 50      |           |                    |                                                              | 4385        | 267        |                   | 11391       | 214        |                 | 2099        | 3468       |
|       | 51      |           |                    |                                                              | 3297        | 239        |                   | 7676        | 93         |                 | 6267        | 1946       |
|       | 52      |           |                    |                                                              | 3863        | 247        |                   | 3812        | 175        |                 | 7466        | 300        |
|       | 53      | caffeine  |                    |                                                              | 5592        | 212        |                   | 6071        | 1990       |                 | 10003       | 901        |
|       | 54      |           |                    |                                                              | 4239        | 834        |                   | 1846        | 2550       |                 | 7091        | 5095       |
|       | 55      |           |                    |                                                              | 505         | 97         |                   | 2087        | 82         |                 | 6715        | 135        |
|       | 56      |           |                    |                                                              | 2310        | 501        |                   | 1344        | 865        |                 | 8078        | 1429       |
| 8     | 57      | control   | 17.12.2018         | 20.12.2018                                                   | 716         | 1419       | 21.12.2018        | 285         | 2822       | 25.12.2018      | 5550        | 1742       |
|       | 58      |           |                    |                                                              | 3055        | 155        |                   | 6272        | 215        |                 | 10132       | 216        |
|       | 59      |           |                    |                                                              | 2434        | 287        |                   | 7774        | 721        |                 | 9583        | 3763       |
|       | 60      |           |                    |                                                              | 768         | 113        |                   | 4353        | 237        |                 | 7606        | 1680       |
|       | 61      | caffeine  |                    |                                                              | 1810        | 110        |                   | 1959        | 183        |                 | 3256        | 253        |
|       | 62      |           |                    |                                                              | 1971        | 67         |                   | 6536        | 167        |                 | 2816        | 660        |
|       | 63      |           |                    |                                                              | 3311        | 130        |                   | 5446        | 133        |                 | 8257        | 1515       |
|       | 64      |           |                    |                                                              | 2720        | 299        |                   | 10208       | 259        |                 | 8955        | 2099       |

<sup>1</sup> date when fish were moved into the individual containers, followed by three days of acclimatization before the first behavior trial and subsequent exposure

Table S2. Measured concentrations ( $\mu\text{g L}^{-1}$ ) of caffeine in randomly selected exposure tanks and behavior arenas.

| Tank ID | Treatment | measured caffeine concentration |       |
|---------|-----------|---------------------------------|-------|
|         |           | Fresh                           | 24H   |
| 1       | control   |                                 | 0.18  |
| 1       | control   |                                 | 0.06  |
| 9       | control   |                                 | 0.05  |
| 9       | control   |                                 | 0.06  |
| 17      | control   |                                 | 0.02  |
| 25      | control   |                                 | 0.09  |
| 33      | control   |                                 | 0.06  |
| 33      | control   |                                 | 0.26  |
| 41      | control   |                                 | 0.06  |
| 41      | control   |                                 | 0.04  |
| 49      | control   |                                 | 0.06  |
| 57      | control   |                                 | 0.02  |
| 5       | caffeine  | 12.02                           | 12.15 |
| 5       | caffeine  | 9.24                            | 10.48 |
| 13      | caffeine  | 7.86                            | 10.81 |
| 13      | caffeine  | 8.95                            | 11.94 |
| 29      | caffeine  | 10.58                           | 7.02  |
| 29      | caffeine  | 11.32                           | 11.17 |
| 29      | caffeine  | 10.90                           | 10.96 |
| 37      | caffeine  | 8.15                            | 7.67  |
| 37      | caffeine  | 7.88                            | 6.71  |
| 37      | caffeine  | 10.03                           | 8.67  |
| 13      | caffeine  | 10.13                           | 6.74  |
| 21      | caffeine  | 11.49                           | 8.91  |
| 21      | caffeine  | 11.93                           | 9.99  |
| 21      | caffeine  | 8.76                            | 7.61  |
| 45      | caffeine  | 7.22                            | 8.42  |
| 45      | caffeine  | 9.11                            | 7.71  |
| 45      | caffeine  | 6.88                            | 8.37  |
| 53      | caffeine  | 6.48                            | 6.20  |
| 53      | caffeine  | 9.42                            | 11.74 |
| 53      | caffeine  | 7.67                            | 9.36  |
| 61      | caffeine  | 8.37                            | 10.06 |
| 61      | caffeine  | 10.08                           | 10.08 |
| 61      | caffeine  | 5.62                            | 10.07 |
| 61      | caffeine  | 11.44                           | 11.36 |
| arena   | control   |                                 | 0.15  |
| arena   | control   |                                 | 0.15  |
| arena   | control   |                                 | 0.04  |
| arena   | control   |                                 | 0.05  |

Table S2, continued. Measured concentrations ( $\mu\text{g L}^{-1}$ ) of caffeine in randomly selected exposure tanks and behavior arenas.

| Tank ID | Treatment | measured caffeine concentration |       |
|---------|-----------|---------------------------------|-------|
|         |           | Fresh                           | 24H   |
| arena   | control   |                                 | 0.15  |
| arena   | control   |                                 | 0.05  |
| arena   | control   |                                 | 0.04  |
| arena   | control   |                                 | 0.08  |
| arena   | caffeine  |                                 | 9.36  |
| arena   | caffeine  |                                 | 7.11  |
| arena   | caffeine  |                                 | 6.79  |
| arena   | caffeine  |                                 | 9.94  |
| arena   | caffeine  |                                 | 5.95  |
| arena   | caffeine  |                                 | 8.32  |
| arena   | caffeine  |                                 | 7.95  |
| arena   | caffeine  |                                 | 8.56  |
| arena   | caffeine  |                                 | 8.08  |
| arena   | caffeine  |                                 | 12.61 |
| arena   | caffeine  |                                 | 10.85 |
| arena   | caffeine  |                                 | 9.06  |
| arena   | caffeine  |                                 | 11.20 |
| arena   | caffeine  |                                 | 10.06 |
| arena   | caffeine  |                                 | 9.60  |

Table S3. Measured concentrations ( $\text{ng g}^{-1}$ ) of caffeine in tissues of 18 control and 18 exposed individuals of fish subsampled for chemical analysis

| Fish ID | Treatment | Muscle | Brain |
|---------|-----------|--------|-------|
| 1       | control   | <LOQ   | <LOQ  |
| 2       | control   | <LOQ   | <LOQ  |
| 3       | control   | <LOQ   | <LOQ  |
| 4       | control   | <LOQ   | <LOQ  |
| 9       | control   | <LOQ   | <LOQ  |
| 10      | control   | <LOQ   | <LOQ  |
| 11      | control   | <LOQ   | <LOQ  |
| 12      | control   | <LOQ   | <LOQ  |
| 17      | control   | <LOQ   | <LOQ  |
| 18      | control   | <LOQ   | <LOQ  |
| 19      | control   | <LOQ   | <LOQ  |
| 20      | control   | <LOQ   | <LOQ  |
| 25      | control   | <LOQ   | <LOQ  |
| 26      | control   | <LOQ   | <LOQ  |
| 27      | control   | <LOQ   | <LOQ  |
| 28      | control   | <LOQ   | <LOQ  |

Table S3, continued. Measured concentrations (ng g<sup>-1</sup>) of caffeine in tissues of 18 control and 18 exposed individuals of fish subsampled for chemical analysis

| Fish ID | Treatment | Muscle | Brain |
|---------|-----------|--------|-------|
| 33      | control   | <LOQ   | <LOQ  |
| 34      | control   | <LOQ   | <LOQ  |
| 5       | caffeine  | 30.6   | 32.0  |
| 6       | caffeine  | 40.5   | 39.7  |
| 7       | caffeine  | 29.9   | 28.8  |
| 8       | caffeine  | 34.4   | 31.3  |
| 13      | caffeine  | 37.5   | 37.3  |
| 14      | caffeine  | 40.9   | 41.1  |
| 15      | caffeine  | 31.9   | 37.9  |
| 16      | caffeine  | 58.0   | 42.5  |
| 21      | caffeine  | 50.4   | 40.3  |
| 22      | caffeine  | 39.2   | 34.4  |
| 23      | caffeine  | 52.5   | 29.7  |
| 24      | caffeine  | 68.1   | 47.6  |
| 29      | caffeine  | 40.6   | 48.7  |
| 30      | caffeine  | 31.7   | 38.4  |
| 31      | caffeine  | 42.7   | 43.5  |
| 32      | caffeine  | 54.4   | 40.5  |
| 37      | caffeine  | 33.8   | 28.5  |
| 38      | caffeine  | 32.9   | 32.6  |

Table S4. Results of statistical analysis—differences in fish activity between treatments at each of the time points when behavioral trials were run.

|                        | Kruskal-Wallis ANOVA by ranks |    |     |         | Post-hoc comparisons <sup>1</sup> , p-values |                |              |
|------------------------|-------------------------------|----|-----|---------|----------------------------------------------|----------------|--------------|
|                        | H-value                       | df | N   | p-value | control light                                | caffeine light | control dark |
| Before exposure        | 69.9                          | 3  | 120 | <0.0001 | caffeine light                               | 1.0000         |              |
|                        |                               |    |     |         | control dark                                 | <0.0001        | <0.0001      |
|                        |                               |    |     |         | caffeine dark                                | <0.0001        | <0.0001      |
| 24 hours post exposure | 50.284                        | 3  | 120 | <0.0001 | caffeine light                               | 1.0000         |              |
|                        |                               |    |     |         | control dark                                 | <0.0001        | <0.0001      |
|                        |                               |    |     |         | caffeine dark                                | <0.0001        | <0.0001      |
| 5 days post exposure   | 48.906                        | 3  | 120 | <0.0001 | caffeine light                               | 1.0000         |              |
|                        |                               |    |     |         | control dark                                 | <0.0001        | 0.00013      |
|                        |                               |    |     |         | caffeine dark                                | <0.0001        | <0.0001      |

<sup>1</sup> Multiple comparisons of mean ranks, two-sided significance levels with a Bonferroni adjustment

Table S5. Results of statistical analysis—differences in fish activity between different time points of behavioral trials for each treatment (i.e. before exposure, after 24 hours of exposure, and after 5 days of exposure).

|                | Friedman ANOVA |    |    |         |             | Post-hoc comparisons |         |
|----------------|----------------|----|----|---------|-------------|----------------------|---------|
|                | Chi Sqr.       | df | N  | p-value | Kendall's W | Comparison           | p-value |
| control light  | 38.4           | 2  | 30 | <0.0001 | 0.64        | Before vs. 24 hrs    | <0.0001 |
|                |                |    |    |         |             | Before vs. 5 days    | <0.0001 |
|                |                |    |    |         |             | 24 hrs vs. 5 days    | 0.002   |
| caffeine light | 17.07          | 2  | 30 | 0.0002  | 0.26        | Before vs. 24 hrs    | 0.005   |
|                |                |    |    |         |             | Before vs. 5 days    | <0.0001 |
|                |                |    |    |         |             | 24 hrs vs. 5 days    | 0.008   |
| control dark   | 19.4           | 2  | 30 | <0.0001 | 0.30        | Before vs. 24 hrs    | 0.50    |
|                |                |    |    |         |             | Before vs. 5 days    | <0.0001 |
|                |                |    |    |         |             | 24 hrs vs. 5 days    | 0.13    |
| caffeine dark  | 20.9           | 2  | 30 | <0.0001 | 0.33        | Before vs. 24 hrs    | 0.10    |
|                |                |    |    |         |             | Before vs. 5 days    | <0.0001 |
|                |                |    |    |         |             | 24 hrs vs. 5 days    | 0.017   |

<sup>1</sup>Multiple comparisons of mean ranks (Wilcoxon signed-ranks), two-sided significance levels with a Bonferroni adjustment
